# Supplementary material for: A novel circular RNA hsa_circRNA_103809/miR-377-3p/GOT1 pathway regulates cisplatin-resistance in non-small cell lung cancer (NSCLC)
Source: Research Square preprint supplement (doi:10.21203/rs.3.rs-50135/v3), 2020-12-05
Supplement: Supplementary file 1 [file acb71233ca315aab44922d3a.docx]

**Supplementary Figure legends**


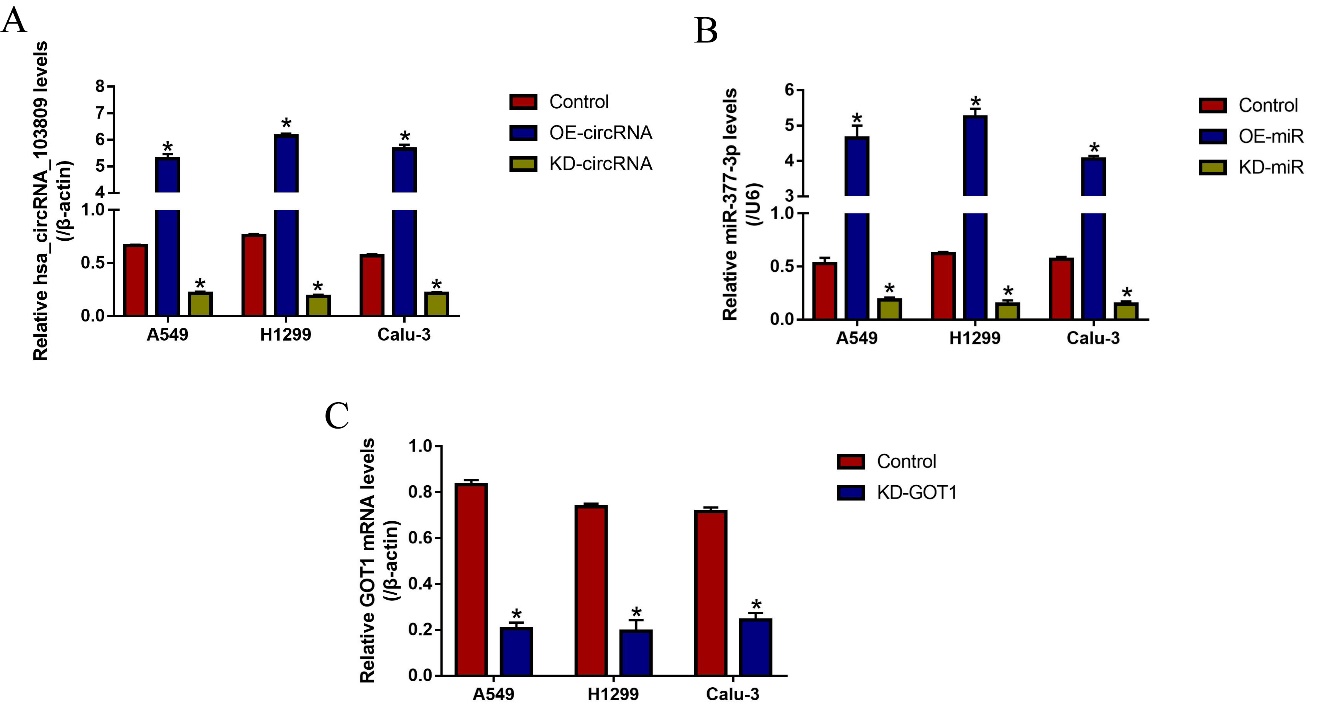


Figure S1. The overexpression and downregulation vectors for (A) hsa_circRNA_103809, (B) miR-377-3p and (C) GOT1 were delivered into A549, H1299 and Calu-3 cells, respectively, and examined by using the Real-Time qPCR analysis. Each experiment repeated at least 3 times. **P* < 0.05.


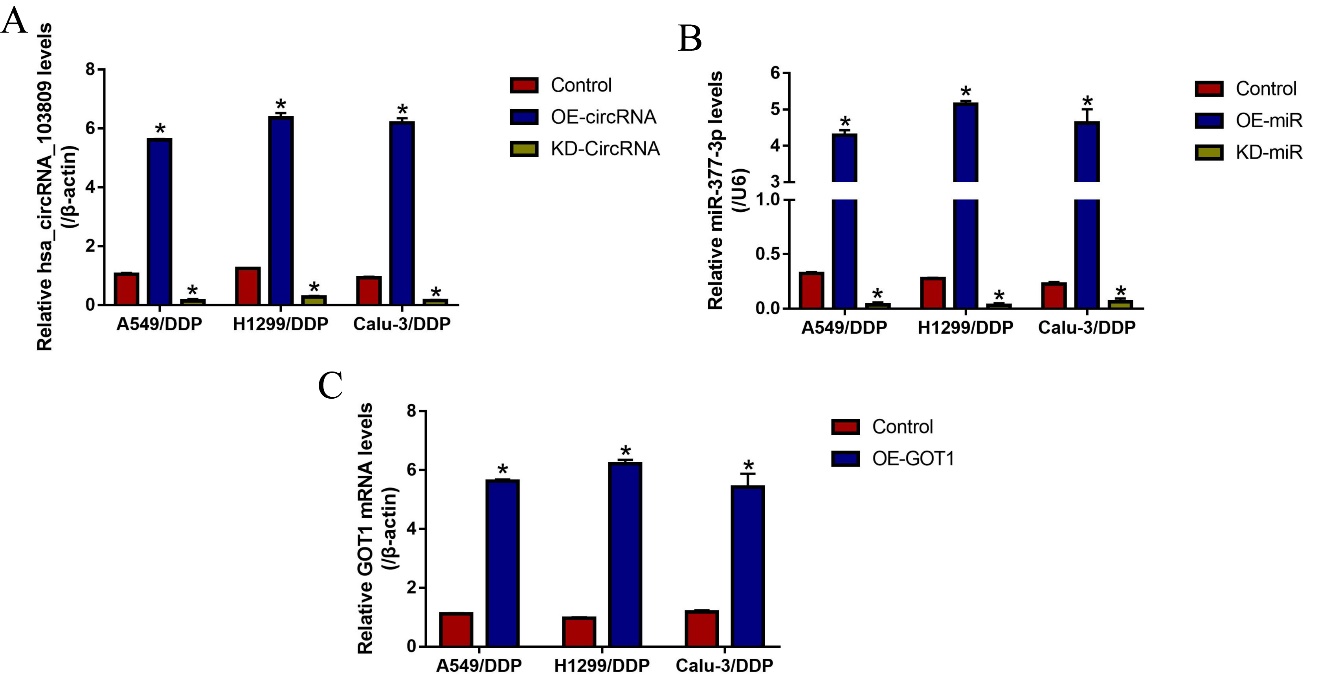


Figure S2. The overexpression and downregulation vectors for (A) hsa_circRNA_103809, (B) miR-377-3p and (C) GOT1 were delivered into A549/DDP, H1299/DDP and Calu-3/DDP cells, respectively, and examined by using the Real-Time qPCR analysis. Each experiment repeated at least 3 times. **P* < 0.05.
